# Supplementary material for: Preparation of pH-responsive hollow poly(MAA-co-EGDMA) nanocapsules for drug delivery and ultrasound imaging
Source: Royal Society of Chemistry journal article supplement (doi:10.1039/c6ra21411h), 2016-01-01
Supplement: c6ra21411h1.pdf [file c6ra21411h1.pdf]

## Preparation of pH-responsive hollow poly(MAA-co-EGDMA) nanocapsules for drug release and ultrasound imaging

He Hu<sup>a</sup>, Xiaofen Zhang<sup>a</sup>, Jin Sun<sup>a</sup>, Lu An<sup>a</sup>, Jing Du<sup>b</sup>, Hong Yang<sup>a</sup>, Fenghua Li<sup>b</sup>, Huixia Wu<sup>a</sup>, Shiping Yang<sup>a\*</sup>,

<sup>a</sup>The Education Ministry Key Lab of Resource Chemistry and Shanghai Key Laboratory of Rare Earth Functional Materials, Shanghai Normal University, Shanghai, 200234, (China)

<sup>b</sup>Department of Ultrasound, Renji Hospital, School of Medicine, Shanghai Jiaotong University, Shanghai, 200127, (China)

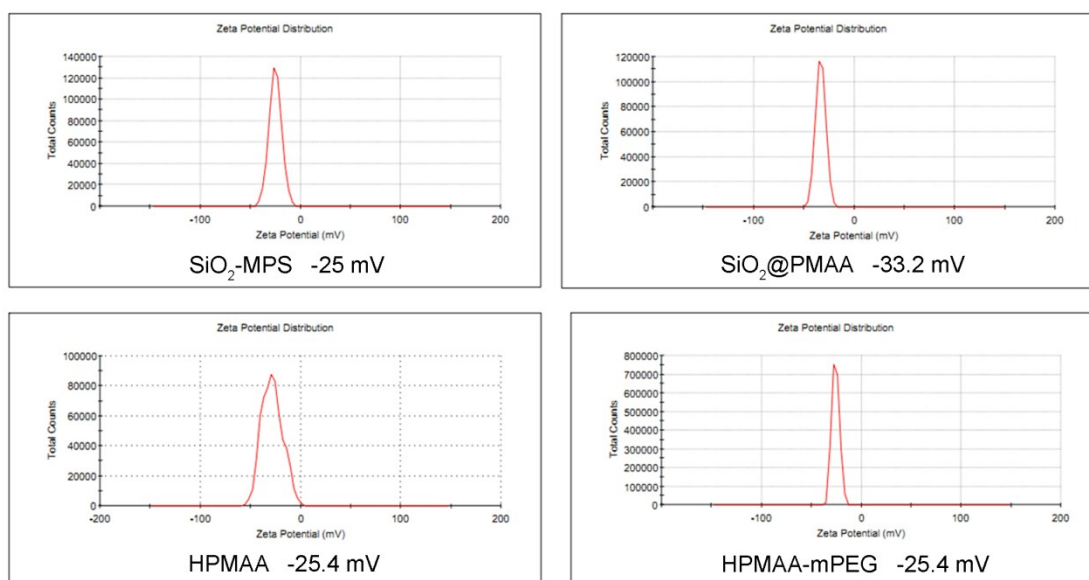

Figure S1. The zeta potential of SiO<sub>2</sub>-MPS, SiO<sub>2</sub>@PMAA, HPMAA, HPMAA-mPEG.

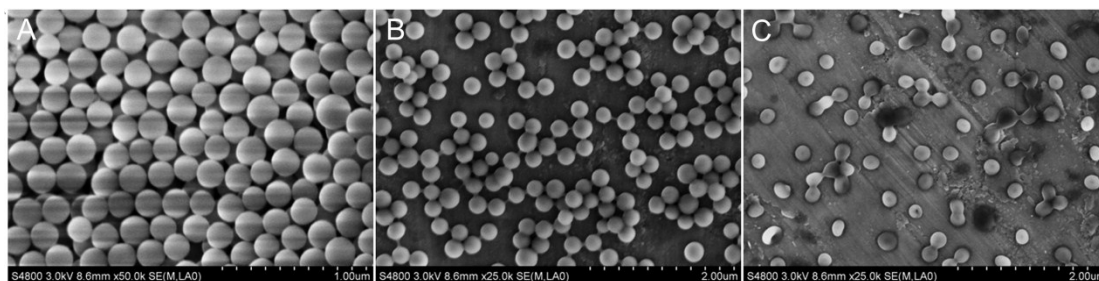

Figure S2. The field emission scanning electron microscopy (FESEM) of (A) SiO<sub>2</sub>-MPS templates, (B) SiO<sub>2</sub>@PMAA core/shell nanoparticles and the final (C) HPMAA-mPEG nanocapsules.
